# Supplementary material
Source: ML conference proceedings conference paper supplement (https://openreview.net/forum?id=HmCmxbCpp2)

Prompt

Person. Bicycle ... Hairdryer.

A woman holds a blow dryer,  
wearing protective goggles

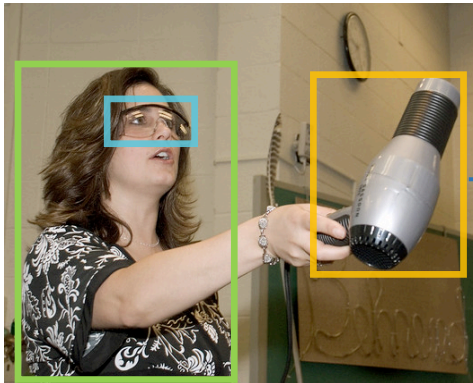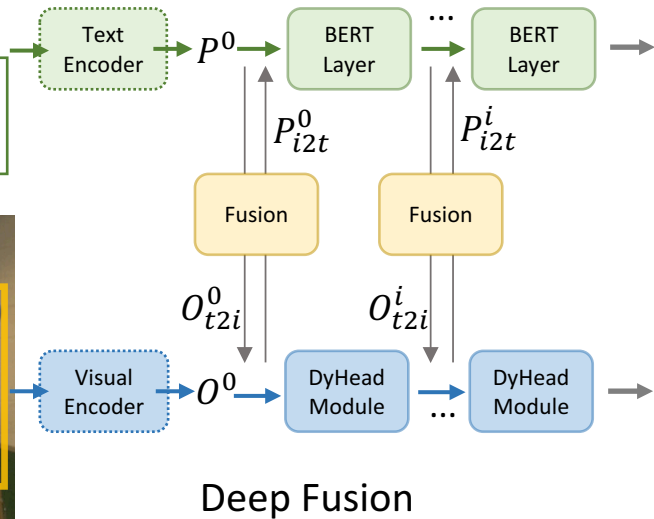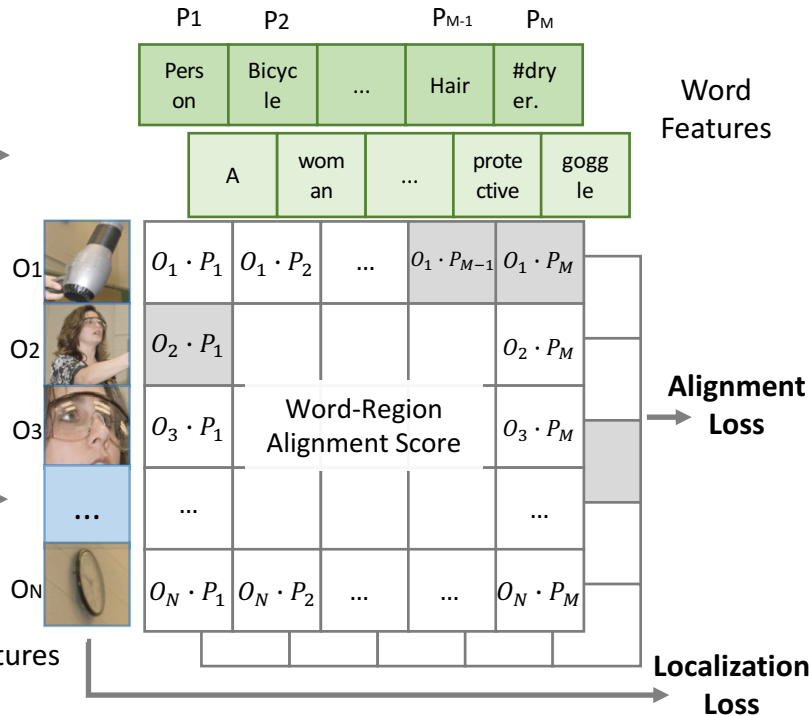

Supplement: supplementary_material [file attachment]
